# Supplementary material for: Molecular Detection and Characterization of Mycoviruses in the Genus <em>Armillaria</em> in the Czech Republic
Source: Preprints.org preprint supplement (doi:10.20944/preprints202404.0158.v1), 2024-04-02
Supplement: Supplementary file 1 [file supplementary]

**A**

**
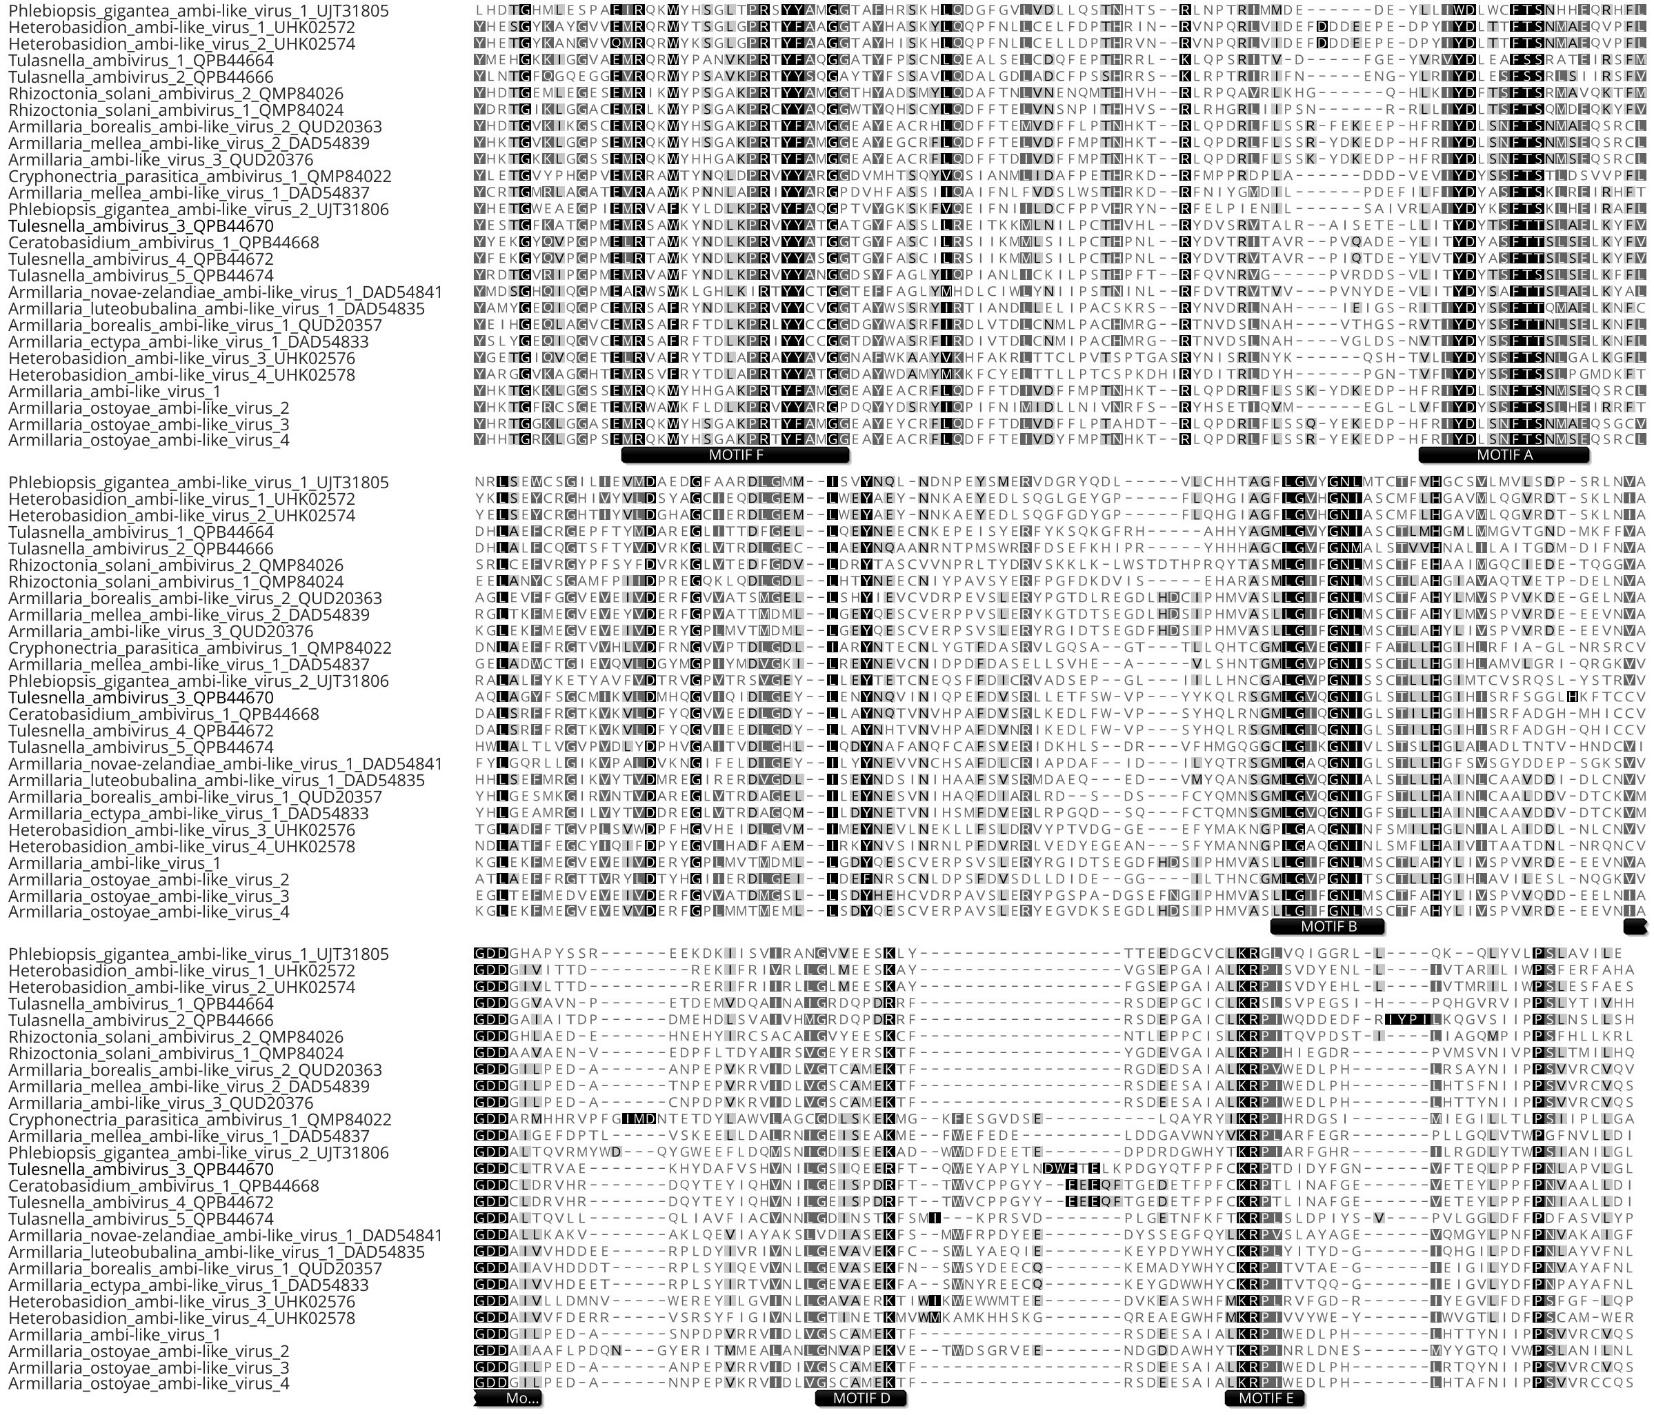
**

**B**

**
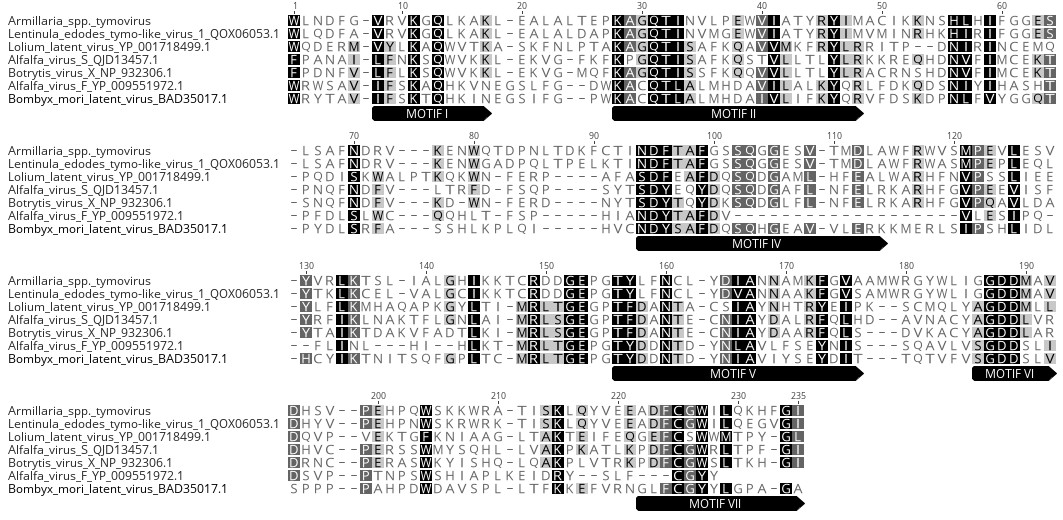
**


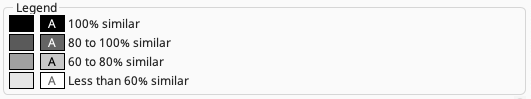


**Figure S1.** Amino acid alignment showing conserved motifs. **A,** Amino acid alignment of ambi-like viruses described in this study and related members. QPB44666 – Tulesnella ambivirus 2, QPB44664 – Tulesnella ambivirus 1, QMP84026 – Rhizoctonia solani ambivirus 2, QMP84024 – Rhizoctonia solani ambivirus 1, QUD20363 – Armillaria borealis ambi-like virus 2, AoALV3 – Armillaria ostoyae ambi-like virus 3*, DAD54839 – Armillaria mellea ambi-like virus 2, AoALV4 - Armillaria ostoyae ambi-like virus 4*, AoALV1 - Armillaria ambi-like virus 1*, QUD20376 – Armillaria ambi-like virus 3, QMP84022 – Cryphonectria parasitica ambivirus 1, AoALV2 - Armillaria ostoyae ambi-like virus 2*, DAD54837 – Armillaria mellea ambi-like virus 1, QPB44674 – Tulesnella ambivirus 5, DAD54841 – Armillaria novae-zelandiae ambi-like virus 1, DAD54835 – Armillaria luteobubalina ambi-like virus 1, QUD20357 – Armillaria borealis ambi-like virus 1, DAD54833 – Armillaria ectypa ambi-like virus 1, QPB44670 – Tulesnella ambivirus 3, QPB44672 – Tulesnella ambivirus 4, QPB44668 – Ceratobasidium ambivirus 1

**B,** Amino acidaligment of Armillaria tymovirus described in this study and related members. AoTV – Armillaria spp. tymovirus*, QOX06053.1 - Lentinula edodes tymo-like virus 1, YP_001718499.1 - Lolium latent virus, QJD13457.1 - Alfalfa virus S, NP_932306.1 - Botrytis virus X, BAD35017.1 - Bombyx mori latent virus, YP_009551972.1 - Alfalfa virus F
